# Supplementary material for: Effect of Pregnancy on eGFR After Kidney Transplantation: A National Cohort Study
Source: PubMed Central journal article supplement — Transplantation. 2022 Aug 27;106(6):1262-1270. doi: 10.1097/TP.0000000000003932 (PMC9128619; doi:10.1097/tp.0000000000003932), 2022-08-27
Supplement: tp-106-1262-s001.pdf [file tp-106-1262-s001.pdf]

Figure S1: Directed Acyclic Graph

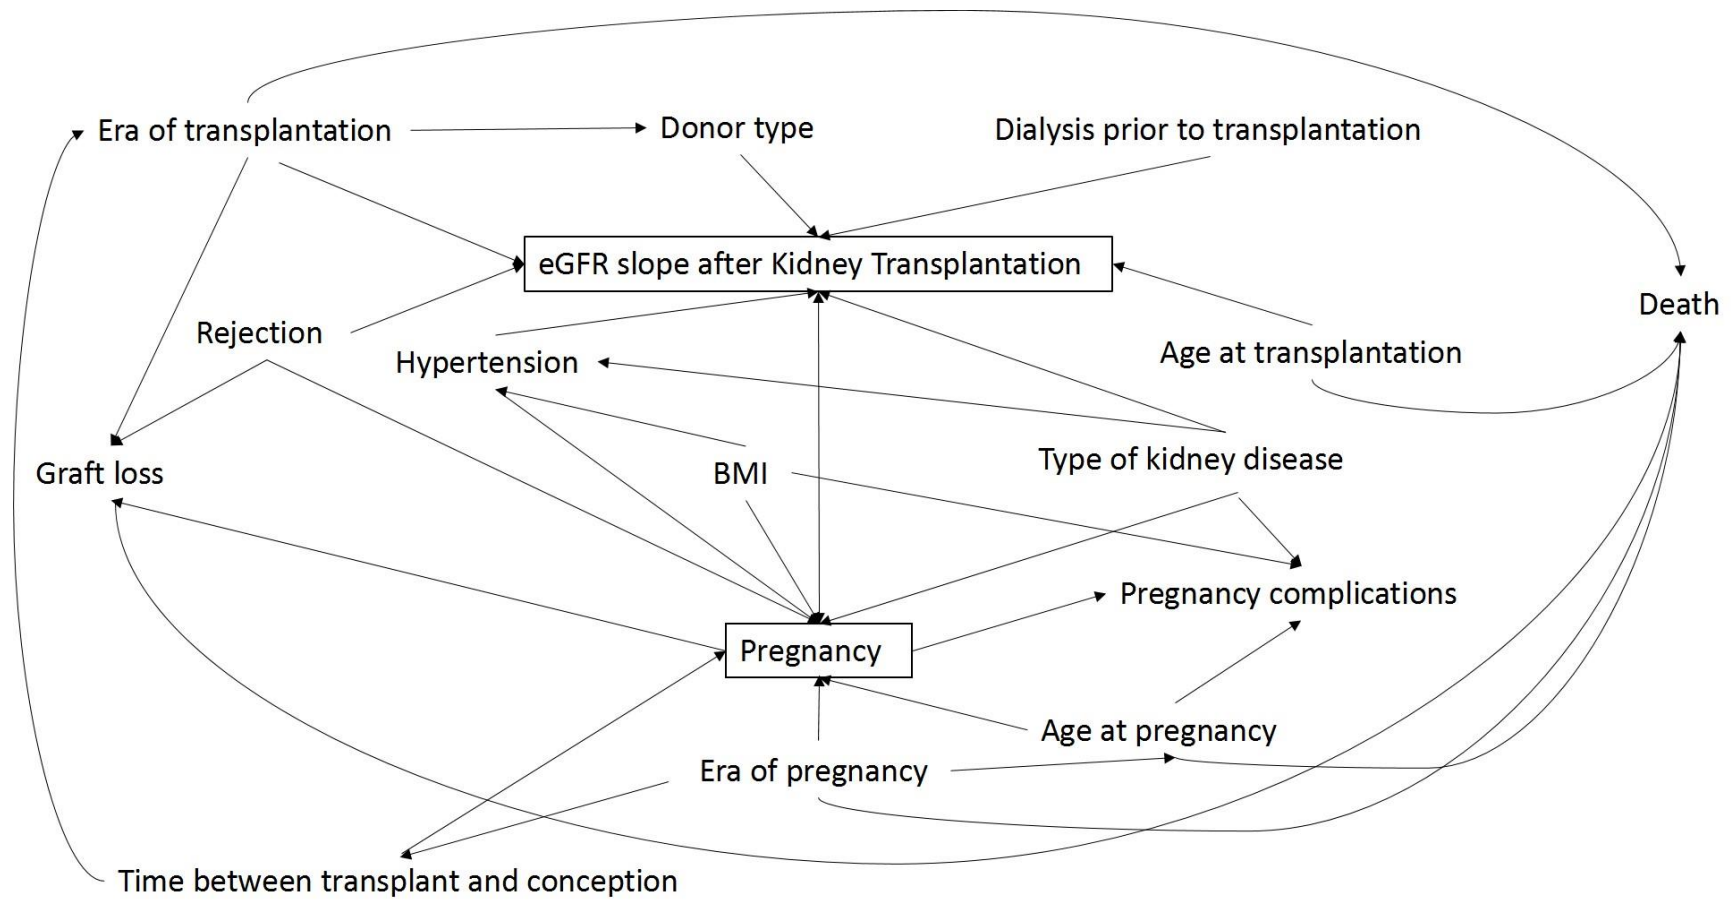

**Table S1: Baseline Characteristics Women transplanted before and after 1990**

|                                                        | Total group N = 197 |                   | Transplanted ≥ 1990<br>N = 132 |                   | Transplanted < 1990<br>N = 65 |                   |
|--------------------------------------------------------|---------------------|-------------------|--------------------------------|-------------------|-------------------------------|-------------------|
|                                                        | N (%)*/<br>Mean ±SD | Missing<br>N (%)* | N (%)*/<br>Mean ±SD            | Missing<br>N (%)* | N (%)*/<br>Mean ±SD           | Missing<br>N (%)* |
| <b>Follow-up time after first delivery (years)**</b>   | 14 (18)             | 0                 | 9 (10)                         | 0                 | 28 (9)                        | 0                 |
| <b>Total pregnancies</b>                               | 295                 |                   | 188                            |                   | 107                           |                   |
| <b>1 pregnancy after KT</b>                            | 109 (55%)           |                   | 79 (60%)                       |                   | 30 (46%)                      |                   |
| <b>2 pregnancies after KT</b>                          | 78 (40%)            |                   | 50 (38%)                       |                   | 28 (43%)                      |                   |
| <b>3 pregnancies after KT</b>                          | 10 (5%)             |                   | 3 (2%)                         |                   | 7 (11%)                       |                   |
| <b>Cause of ESRD</b>                                   |                     | 18 (9%)           |                                | 13 (10%)          |                               |                   |
| <b>Glomerulonephritis</b>                              | 77 (39%)            |                   | 48 (36%)                       |                   | 29 (45%)                      |                   |
| <b>Diabetes mellitus</b>                               | 6 (3%)              |                   |                                |                   |                               |                   |
| <b>Auto-immune (SLE/vasculitis)</b>                    | 8 (4%)              |                   |                                |                   |                               |                   |
| <b>Tubulo-interstitial</b>                             | 29 (15%)            |                   |                                |                   |                               |                   |
| <b>Cystic kidney disease</b>                           | 8 (4%)              |                   |                                |                   |                               |                   |
| <b>Renal vascular disease (excl. vasculitis)</b>       | 7 (4%)              |                   |                                |                   |                               |                   |
| <b>Urologic</b>                                        | 7 (4%)              |                   |                                |                   |                               |                   |
| <b>Other congenital hereditary</b>                     | 23 (12%)            |                   |                                |                   |                               |                   |
| <b>Other multi cystic diseases</b>                     | 5 (3%)              |                   |                                |                   |                               |                   |
| <b>Other</b>                                           | 22 (11%)            |                   |                                |                   |                               |                   |
| <b>Maternal death during follow-up</b>                 | 28 (14%)            | 0                 | 8 (6%)                         | 0                 | 20 (31%)                      | 0                 |
| <b>Time between first delivery and death (years)**</b> | 14 (10)             |                   | 9 (5)                          |                   | 16 (15)                       |                   |
| <b>Age at KT (years)</b>                               | 25 (6)              | 0                 | 27 (8)                         | 0                 | 24 (9)                        |                   |
| <b>Year of KT</b>                                      | 1995 (12)           | 0                 | 2003 (13)                      | 0                 | 1982 (9)                      | 0                 |
| <b>1971-1989</b>                                       | 65 (33%)            |                   |                                |                   |                               |                   |
| <b>1990-1999</b>                                       | 50 (25%)            |                   |                                |                   |                               |                   |
| <b>2000-2009</b>                                       | 56 (28%)            |                   |                                |                   |                               |                   |

|                                                              |          |             |          |          |          |          |
|--------------------------------------------------------------|----------|-------------|----------|----------|----------|----------|
| <b>2010-2015</b>                                             | 26 (13%) |             |          |          |          |          |
| <b>Living donor KT</b>                                       | 83 (42%) | 6 (3%)      | 78 (59%) | 2 (2%)   | 5 (8%)   | 4(6%)    |
| <b>Pre-emptive KT</b>                                        | 36 (18%) | 18 (9%)     | 32 (24%) | 12 (9%)  | 4 (6%)   | 6 (9%)   |
| <b>&gt; 1 KT before pregnancy</b>                            | 39 (20%) | 5 (3%)      | 23 (17%) | 3 (2%)   | 16 (25%) | 2 (3%)   |
| <b>Rejection before pregnancy</b>                            | 68 (35%) | 46<br>(23%) | 37 (28%) | 30 (23%) | 30 (46%) | 16 (25%) |
| <b>Graft loss during pregnancy</b>                           | 1 (0.5%) | 0           | 1 (0.5%) | 0        |          |          |
| <b>Graft loss after first pregnancy</b>                      | 42 (24%) | 25<br>(13%) | 26 (20%) | 13 (10%) | 16 (25%) | 12 (19%) |
| <b>Time between first pregnancy and graft loss (years)**</b> | 6 (7)    | 0           | 6 (5)    | 0        | 8 (8)    | 0        |
| <b>Time between KT and graft loss (years)**</b>              | 12 (7)   | 0           | 11 (7)   | 0        | 13 (7)   | 0        |

KT: kidney transplantation (last KT before pregnancy), eGFR: estimated Glomerular Filtration Rate, ESRD: end stage renal disease, MAP: mean arterial pressure, CNI: calcineurine inhibitors, BMI: body mass index, SCr: serum creatinine, SD: standard deviation \* Due to rounding it can be possible that percentages not reach 100%, \*\*Median (IQR)

**Table S2: Characteristics of all 1<sup>st</sup> pregnancies (n=197) before and after 1990**

|                                               | Total group N = 197 |                   | Transplanted ≥ 1990 = 132 |                   | Transplanted < 1990<br>N = 65 |                   |
|-----------------------------------------------|---------------------|-------------------|---------------------------|-------------------|-------------------------------|-------------------|
|                                               | N (%)*/<br>Mean ±SD | Missing<br>N (%)* | N (%)*/<br>Mean ±SD       | Missing<br>N (%)* | N (%)*/<br>Mean ±SD           | Missing<br>N (%)* |
| <b>KT to conception interval (year) **</b>    | 4 (6)               | 8 (4%)            | 4 (5)                     | 3 (2%)            | 5 (6)                         | 5 (8%)            |
| <b>0- 2 year</b>                              | 29 (15%)            |                   |                           |                   |                               |                   |
| <b>2 – 4 year</b>                             | 78 (41%)            |                   |                           |                   |                               |                   |
| <b>5 – 9 years</b>                            | 49 (25%)            |                   |                           |                   |                               |                   |
| <b>10 - 24 years</b>                          | 33 (17%)            |                   |                           |                   |                               |                   |
| <b>Pre-pregnancy eGFR</b>                     | 62 (±21)            | 7 (4%)            | 58 (±19)                  | 3 (2%)            | 71 (±24)                      | 4 (6%)            |
| <b>eGFR &lt; 45 ml/min/1.73m<sup>2</sup></b>  | 34 (17%)            |                   | 25 (19%)                  |                   | 9 (14%)                       |                   |
| <b>eGFR &lt; 30 ml/min/ 1.73m<sup>2</sup></b> | 8 (4%)              |                   | 4 (3%)                    |                   | 4 (6%)                        |                   |
| <b>Pre-pregnancy MAP</b>                      | 95 (±10)            | 30 (15%)          | 94 (±10)                  | 15 (11%)          | 97 (±12)                      | 15 (23%)          |
| <b>Pre-pregnancy hypertension</b>             | 99 (50%)            | 24 (12%)          | 71 (54%)                  | 12 (9%)           | 28 (43%)                      | 12 (19%)          |
| <b>CNI before first pregnancy</b>             | 97 (49%)            | 8 (4%)            | 83 (63%)                  | 4 (3%)            | 14 (22%)                      | 4 (6%)            |
| <b>Year of pregnancy</b>                      | 2004 (18)           | 0                 | 2009 (10)                 | 0                 | 1989 (10)                     | 0                 |
| <b>1979-1989</b>                              | 37 (19%)            |                   |                           |                   |                               |                   |
| <b>1990-1999</b>                              | 44 (22%)            |                   |                           |                   |                               |                   |
| <b>2000-2009</b>                              | 54 (27%)            |                   |                           |                   |                               |                   |
| <b>2010-2017</b>                              | 62 (32%)            |                   |                           |                   |                               |                   |
| <b>Pre-pregnancy BMI</b>                      | 25 (±4)             | 70 (36%)          | 25(±4)                    | 33 (25%)          | 23 (±2)                       | 37 (57%)          |
| <b>Primipara at first pregnancy after KT</b>  | 154 (78%)           | 5 (3%)            | 100 (76%)                 | 2 (2%)            | 54 (83%)                      | 3 (5%)            |
| <b>Preterm &lt; 37 weeks</b>                  | 102 (52%)           | 13 (7%)           | 77 (58%)                  | 4 (3%)            | 25 (39%)                      | 9 (14%)           |
| <b>Preterm &lt; 34 weeks</b>                  | 50 (25%)            |                   |                           |                   |                               |                   |
| <b>Birthweight (gram)</b>                     | 2281 (±853)         | 13 (7%)           | 2174 (±928)               | 5 (4%)            | 2520 (±597)                   | 8 (12%)           |

|                                               |                |          |                |          |                |          |
|-----------------------------------------------|----------------|----------|----------------|----------|----------------|----------|
| <b>Low birthweight (&lt;2500 gram)</b>        | 103 (52%)      |          | 76 (58%)       |          | 27 (42%)       |          |
| <b>Very low birthweight (&lt;1500 gram)</b>   | 30 (15%)       |          | 27 (21%)       |          | 3 (5%)         |          |
| <b>Gestational hypertension</b>               | 90 (46%)       | 37 (19%) | 69 (52%)       | 15 (11%) | 21 (32%)       | 22 (34%) |
| <b>Severe hypertension</b>                    | 30 (15%)       | 56 (28%) | 22 (17%)       | 29 (22%) | 8 (12%)        | 28 (43%) |
| <b>Preeclampsia</b>                           | 60 (31%)       | 32 (16%) | 49 (37%)       | 12 (9%)  | 11 (17%)       | 20 (31%) |
| <b>% Scr decrease during pregnancy</b>        | 17 ( $\pm$ 10) | 45 (23%) | 17 ( $\pm$ 10) | 22 (17%) | 15 ( $\pm$ 11) | 25 (38%) |
| <b>&gt; 15% Scr decrease during pregnancy</b> | 90 (46%)       |          | 67 (51%)       |          | 21 (32%)       |          |

KT: kidney transplantation (last KT before pregnancy), eGFR: estimated Glomerular Filtration Rate, ESRD: end stage renal disease, MAP: mean arterial pressure, CNI: calcineurine inhibitors, BMI: body mass index, SCr: serum creatinine, SD: standard deviation \* Due to rounding it can be possible that percentages not reach 100%, \*\*Median (IQR)

**Table S3: Declaration of missing subjects per pregnancy interval**

| Missing                                  | Pregnancy interval 0                            |                                                 |                                                 | Pregnancy interval 1                                                                |                                              |                                                                                     |
|------------------------------------------|-------------------------------------------------|-------------------------------------------------|-------------------------------------------------|-------------------------------------------------------------------------------------|----------------------------------------------|-------------------------------------------------------------------------------------|
| Reasons for missing pregnancy interval 0 |                                                 |                                                 |                                                 | Reasons for missing pregnancy interval 1                                            |                                              |                                                                                     |
| 1                                        | R-27<br>unknown/check-ups non-academic hospital | E-22<br>Conception within 6months after KT      | L-4<br>unknown/check-ups non-academic hospital  | E-7<br>Short time period between 1 <sup>st</sup> and 2 <sup>nd</sup> preg after KT  | A-2<br>Graft loss during pregnancy           | L-23<br>Short time period between 1 <sup>st</sup> and 2 <sup>nd</sup> preg after KT |
| 2                                        | R-14<br>Conception within 6 months after. KT    | L-22<br>unknown/check-ups non-academic hospital | L-24<br>unknown/check-ups non-academic hospital | E-17<br>Short time period between 1 <sup>st</sup> and 2 <sup>nd</sup> preg after KT | A-18<br>Lost to follow-up after pregnancy    |                                                                                     |
| 3                                        | L-5<br>unknown/check-ups non-academic hospital  | R-9<br>Conception within 6months after KT       | R-24<br>unknown/check-ups non-academic hospital | E-29<br>Short time period between 1 <sup>st</sup> and 2 <sup>nd</sup> preg after KT | E-8<br>DCGL before annual eGFR measurement   |                                                                                     |
| 4                                        |                                                 |                                                 |                                                 | L-13<br>Short time period between 1 <sup>st</sup> and 2 <sup>nd</sup> preg after KT | L-33<br>Death before annual eGFR measurement |                                                                                     |
| 5                                        |                                                 |                                                 |                                                 | L-23<br>Short time period between 1 <sup>st</sup> and 2 <sup>nd</sup> preg after KT | R-6<br>recent pregnancy no follow up yet     |                                                                                     |

|                                                   |                                    |                             |                             |                                                                                     |                                                 |                                         |
|---------------------------------------------------|------------------------------------|-----------------------------|-----------------------------|-------------------------------------------------------------------------------------|-------------------------------------------------|-----------------------------------------|
| 7                                                 |                                    |                             |                             | M-5<br>Short time period between 1 <sup>st</sup> and 2 <sup>nd</sup> preg after KT  | R-8<br>recent pregnancy nn follow up yet        |                                         |
| 8                                                 |                                    |                             |                             | R-1<br>Short time period between 1 <sup>st</sup> and 2 <sup>nd</sup> preg after KT  | R-35<br>unknown/check-ups non-academic hospital |                                         |
| 9                                                 |                                    |                             |                             | G-41<br>Short time period between 1 <sup>st</sup> and 2 <sup>nd</sup> preg after KT |                                                 |                                         |
| 10                                                |                                    |                             |                             | G-44<br>Short time period between 1 <sup>st</sup> and 2 <sup>nd</sup> preg after KT |                                                 |                                         |
| <b>Included</b>                                   | <b>Pregnancy interval 1&amp; 2</b> | <b>Pregnancy interval 1</b> | <b>Pregnancy interval 2</b> | <b>Pregnancy interval 0 &amp; 2</b>                                                 | <b>Pregnancy interval 0</b>                     | <b>Pregnancy interval. 0, 2 &amp; 3</b> |
| <b>Total number of included eGFR measurements</b> | <b>18</b>                          | <b>53</b>                   | <b>31</b>                   | <b>132</b>                                                                          | <b>36</b>                                       | <b>11</b>                               |

**Figure S2: Adjusted mean eGFR before and after pregnancy after kidney transplantation (GEE)**

**Only women with one pregnancy after kidney transplantation (n=109)**

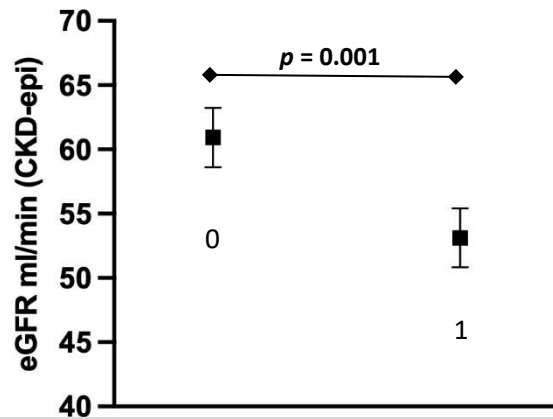

| Characteristics per pregnancy interval       | Before 1st pregnancy (0) | After 1st pregnancy (1)                   |
|----------------------------------------------|--------------------------|-------------------------------------------|
| Women included                               | 105                      | 100                                       |
| Total nr. of eGFR                            | 681                      | 796                                       |
| Median nr. of eGFR per woman (IQR)           | 6 (4)                    | 5 (9)                                     |
| Median yrs between first and last eGFR (IQR) | 2.09 (4.22)              | 6.14 (10.20)                              |
| Mean eGFR slope (compared to interval 0)     | Reference                | -7.81 ml/min/1.73m <sup>2</sup> (p=0.001) |

GEE: generalized estimated equations; a multilevel method. KT: kidney transplantation (last KT before pregnancy); eGFR: estimated Glomerular Filtration Rate. \*median (IQR). Subject level: subject ID, Within-subject level: days after KT. In the model, years after KT was used as a continuous covariate and pregnancy interval as a categorical factor. Error bars illustrate standard deviation (SD). eGFR during pregnancy was excluded.



**Table S4: Multivariate analysis with adverse pregnancy outcomes.**

|                                                              | <b>B coefficient</b> | <b>Standard error<br/>of the mean<br/>(SEM)</b> | <b>p-value</b>  |
|--------------------------------------------------------------|----------------------|-------------------------------------------------|-----------------|
| <b>After first pregnancy</b>                                 | -0.73                | 3.41                                            | 0.83            |
| <b>Year of KT <math>\geq</math> 1990</b>                     | 2.83                 | 2.44                                            | 0.25            |
| <b>Transplant vintage (years)</b>                            | <b>-1.00</b>         | <b>0.24</b>                                     | <b>&lt;0.01</b> |
| <b>Age at KT</b>                                             | 0.03                 | 0.22                                            | 0.90            |
| <b>Primipara</b>                                             | 0.62                 | 2.81                                            | 0.83            |
| <b>Rejection before 1<sup>st</sup> pregnancy</b>             | <b>-2.90</b>         | <b>1.65</b>                                     | <b>0.08</b>     |
| <b>KT to 1<sup>st</sup> conception interval (years)</b>      | <b>1.20</b>          | <b>0.27</b>                                     | <b>&lt;0.01</b> |
| <b>Pre-pregnancy eGFR (1<sup>st</sup> pregnancy)</b>         | <b>0.82</b>          | <b>0.06</b>                                     | <b>&lt;0.01</b> |
| <b>Pre-pregnancy hypertension (1<sup>st</sup> pregnancy)</b> | -1.31                | 2.35                                            | 0.58            |
| <b>CNI before 1<sup>st</sup> pregnancy</b>                   | 0.62                 | 1.59                                            | 0.70            |
| <b>Gestational hypertension</b>                              | -0.09                | 3.40                                            | 0.98            |
| <b>Low birthweight &lt;2500 gram</b>                         | -0.82                | 3.13                                            | 0.80            |
| <b>&gt; 15% SCr decrease during pregnancy</b>                | -0.30                | 3.22                                            | 0.93            |

For this analysis a dichotomous variable 'After first pregnancy' was created (before or after pregnancy). After pregnancy means all eGFR measurements after 1<sup>st</sup> pregnancy (pregnancy interval 1), after 2<sup>nd</sup> pregnancy (pregnancy interval 2) and after 3<sup>rd</sup> pregnancy (pregnancy interval 3). eGFRs during pregnancy and within 6 months after delivery were excluded. eGFR: estimated Glomerular Filtration Rate, CNI: calcineurin inhibitor, GEE: generalized estimated equations, KT: kidney transplantation
